# Supplementary material
Source: PubMed Central journal article supplement (PMC9214248)
Supplement: web_material_kwab151.pdf [file web_material_kwab151.pdf]

## **WEB MATERIAL**

### **Inconsistent Reporting of Discrimination Over Time Using the Experiences of Discrimination Scale: Potential Underestimation of Lifetime Burden**

Miriam E. Van Dyke, Michael R. Kramer, Kiarri N. Kershaw, Viola Vaccarino, Natalie D.  
Crawford, and Tené T. Lewis

#### **Contents**

Web Table 1

Web Table 2

Web Table 3

**Web Table 1.** Reporting Patterns of “Ever” Experiencing Discrimination Across 1992, 2000, and 2010 in the Coronary Artery Risk Development in Young Adults Study, According to Selected Demographic Characteristics

| Discrimination Reporting Pattern<br>Across 1992, 2000, and 2010 | Racial Discrimination           |                      | SES Discrimination                    |                                       | Sex Discrimination   |                    |
|-----------------------------------------------------------------|---------------------------------|----------------------|---------------------------------------|---------------------------------------|----------------------|--------------------|
|                                                                 | African-American<br>(n = 1,179) | White<br>(n = 1,595) | <16 Years of Education<br>(n = 1,501) | ≥16 Years of Education<br>(n = 1,266) | Women<br>(n = 1,566) | Men<br>(n = 1,208) |
|                                                                 | No. (%)                         | No. (%)              | No. (%)                               | No. (%)                               | No. (%)              | No. (%)            |
| Never, never, never                                             | 104 (8.8)                       | 950 (59.6)           | 595 (39.6)                            | 725 (57.3)                            | 225 (14.4)           | 534 (44.2)         |
| Never, never, ever                                              | 30 (2.5)                        | 57 (3.6)             | 78 (5.2)                              | 56 (4.4)                              | 36 (2.3)             | 35 (2.9)           |
| Never, ever, ever                                               | 51 (4.3)                        | 40 (2.5)             | 66 (4.4)                              | 46 (3.6)                              | 70 (4.5)             | 44 (3.6)           |
| <b>Never, ever, never</b>                                       | <b>62 (5.3)</b>                 | <b>87 (5.4)</b>      | <b>131 (8.7)</b>                      | <b>85 (6.7)</b>                       | <b>88 (5.6)</b>      | <b>122 (10.1)</b>  |
| <b>Ever, never, never</b>                                       | <b>121 (10.3)</b>               | <b>191 (12.0)</b>    | <b>209 (13.9)</b>                     | <b>126 (10.0)</b>                     | <b>227 (14.5)</b>    | <b>162 (13.4)</b>  |
| <b>Ever, never, ever</b>                                        | <b>42 (3.6)</b>                 | <b>33 (2.1)</b>      | <b>60 (4.0)</b>                       | <b>31 (2.4)</b>                       | <b>70 (4.5)</b>      | <b>36 (3.0)</b>    |
| <b>Ever, ever, never</b>                                        | <b>173 (14.7)</b>               | <b>112 (7.0)</b>     | <b>142 (9.5)</b>                      | <b>81 (6.4)</b>                       | <b>308 (19.7)</b>    | <b>132 (10.9)</b>  |
| Ever, ever, ever                                                | 596 (50.6)                      | 125 (7.8)            | 220 (14.7)                            | 116 (9.2)                             | 542 (34.6)           | 143 (11.8)         |
|                                                                 |                                 |                      |                                       |                                       |                      |                    |
| <b>Total inconsistent reporting</b>                             | 398 (33.8)                      | 423 (26.5)           | 542 (36.1)                            | 323 (25.5)                            | 693 (44.3)           | 452 (37.4)         |

Boldface categories denote inconsistent reporting patterns across the 3 study visits. Information on education was missing for 7 participants. Percentages may sum to >100 due to rounding.

**Web Table 2.** Frequency of Settings in Which Discrimination Was Reported in the Coronary Artery Risk Development in Young Adults Study in 1992, 2000, and 2010 ( $n = 2,774$ )

| Setting                              | Racial Discrimination |            |            | SES Discrimination |            |            | Sex Discrimination |            |            |
|--------------------------------------|-----------------------|------------|------------|--------------------|------------|------------|--------------------|------------|------------|
|                                      | 1992                  | 2000       | 2010       | 1992               | 2000       | 2010       | 1992               | 2000       | 2010       |
|                                      | No. (%)               | No. (%)    | No. (%)    | No. (%)            | No. (%)    | No. (%)    | No. (%)            | No. (%)    | No. (%)    |
| At school                            | 526 (19.0)            | 469 (16.9) | 363 (13.1) | 355 (12.8)         | 343 (12.4) | 245 (8.8)  | 518 (18.7)         | 477 (17.2) | 318 (11.5) |
| Getting a job                        | 648 (23.4)            | 615 (22.2) | 489 (17.6) | 338 (12.2)         | 298 (10.7) | 249 (9.0)  | 727 (26.2)         | 663 (23.9) | 458 (16.5) |
| At work                              | 720 (26.0)            | 685 (24.7) | 521 (18.8) | 413 (14.9)         | 413 (14.9) | 304 (11.0) | 1,002 (36.1)       | 880 (31.7) | 586 (21.1) |
| Getting housing                      | 357 (12.9)            | 320 (11.5) | 242 (8.7)  | 339 (12.2)         | 296 (10.7) | 216 (7.8)  | —                  | 251 (9.1)  | 164 (5.9)  |
| Getting medical care                 | 172 (6.2)             | 163 (5.9)  | 151 (5.4)  | 210 (7.6)          | 206 (7.4)  | 193 (7.0)  | 229 (8.3)          | 195 (7.0)  | 140 (5.1)  |
| On the street or in a public setting | 1,051 (37.9)          | 983 (35.4) | 717 (25.9) | 544 (19.6)         | 565 (20.4) | 385 (13.9) | 1,160 (41.8)       | 951 (34.3) | 581 (20.9) |
| From the police or in the courts     | 478 (17.2)            | —          | —          | 327 (11.8)         | —          | —          | —                  | —          | —          |
| At home                              | —                     | 48 (1.7)   | 33 (1.2)   | —                  | 71 (2.6)   | 65 (2.3)   | 354 (12.8)         | 249 (9.0)  | 138 (5.0)  |

A dash (—) denotes that a setting was not queried about at the respective study visit.



|                                            |              |            |             |            |            |            |              |              |             |
|--------------------------------------------|--------------|------------|-------------|------------|------------|------------|--------------|--------------|-------------|
| <b>Education</b>                           |              |            |             |            |            |            |              |              |             |
| <16 years of education ( <i>n</i> = 1,501) | 854 (56.9)   | 778 (51.8) | 536 (35.7)^ | 631 (42.0) | 559 (37.2) | 424 (28.2) | 881 (58.7)^  | 820 (54.6)   | 536 (35.7)^ |
| ≥16 years of education ( <i>n</i> = 1,266) | 535 (42.3)   | 467 (36.9) | 438 (34.6)  | 354 (28.0) | 328 (25.9) | 249 (19.7) | 734 (58.0)   | 626 (49.4)   | 438 (34.6)  |
| <b>Annual income</b>                       |              |            |             |            |            |            |              |              |             |
| <\$50,000 ( <i>n</i> = 1,821)              | 1,019 (56.0) | 923 (50.7) | 696 (38.2)  | 751 (41.2) | 685 (37.6) | 532 (29.2) | 1,117 (61.3) | 1,027 (56.4) | 696 (38.2)  |
| ≥\$50,000 ( <i>n</i> = 519)                | 221 (42.6)   | 192 (37.0) | 149 (28.7)  | 140 (27.0) | 127 (24.5) | 80 (15.4)  | 285 (54.9)   | 233 (44.9)   | 149 (28.7)  |

Data on age, education, and income were collected in 1992; data on race and sex were collected at baseline (1985).

^ No differences across subgroups were observed in the reporting of ever experiencing discrimination at the respective study visit;

$\chi^2$  test: 2-sided  $P > 0.05$ .
